# Supplementary material for: High throughput gene expression profiling of yeast colonies with microgel-culture Drop-seq
Source: Royal Society of Chemistry journal article supplement (doi:10.1039/c9lc00084d), 2019-01-01
Supplement: c9lc00084d1.pdf [file c9lc00084d1.pdf]

## Supplementary Information

### High throughput gene expression profiling of yeast colonies with microgel-culture Drop-seq

Leqian Liu<sup>1</sup>, Chiraj K. Dalal<sup>2</sup>, Benjamin M. Heineike<sup>3</sup>, Adam R. Abate<sup>1,4,5</sup>

<sup>1</sup> Bioengineering and Therapeutic Sciences, University of California, San Francisco, San Francisco, CA 94158, USA

<sup>2</sup> Department of Microbiology and Immunology, University of California, San Francisco, CA 94158, USA

<sup>3</sup> Biological and Medical Informatics PhD Program, University of California, San Francisco, CA 94158, USA

<sup>4</sup> California Institute for Quantitative Biosciences, University of California San Francisco, San Francisco, CA 94158, USA

<sup>5</sup> Chan Zuckerberg Biohub, San Francisco, CA 94158, USA.

**Supplementary Figure 1. Comparison of ICO-seq data and bulk sequencing data.** Bulk sequencing data was collected from W303a yeast cells containing mutations rendering them sensitive to PKA inhibition via the ATP analog 1-NM-PP1. Three samples of exponentially growing cells were collected 40 minutes after adding 3uM 1-NM-PP1 or DMSO and libraries were prepared using the Lexogen Quant-Seq 3' mRNA prep kit (Cat. No. 015.96) at 45 minutes YPD plus and minus 3uM 1-NM-PP1 [B. Heineike, unpublished data]. After filtering the dataset so that only genes analyzed for individual colonies were considered, counts were normalized and multiplied by the same scaling factor as was used for the individual colonies. The same pseudocount as was added to the individual colony data was added to the data prior to taking the log10 value. On the X axis, bulk data from cells without or with 1-NM-PP1 (left, right respectively) was plotted and the log expression averaged over all colonies, or clusters A, B and C were plotted on the Y axis. The Pearson correlation coefficient was calculated and a best fit line is displayed.

**Supplementary Figure 2. Comparison of ICO-seq data and bulk sequencing data from cells grown on solid media.** This bulk data from yeast colonies on solid media is plotted on the X axis. Average ICO-seq data for all colonies analyzed and grouped by cluster is plotted on the Y axis. Average data for the colonies was calculated by summing counts from all colonies and then normalizing, adding a pseudocount, and taking the log10 of the result. The Pearson correlation coefficient was calculated and a best fit line is displayed.

**Supplementary Figure 3. A representative bioanalyzer trace of cDNA library generated using ICO-seq.** A high sensitivity DNA chip was used to analyze cDNA library generated using ICO-seq with *S. cerevisiae*. The bioanalyzer trace of cDNA library is similar to standard Drop-seq cDNA library.

**Supplementary Table 1. Genes that characterize the Principal Components and  $\vec{v}_{het}$  and  $\vec{v}_{sep}$ .** Genes of the first three principal components, as well as the vectors  $\vec{v}_{sep}$  and  $\vec{v}_{het}$  with 30 largest magnitude negative and positive coefficients.

**Supplementary Table 2. Top genes differentially expressed between clusters.** The log10 normalized counts for each gene in a cluster were averaged and then the values for cluster A was subtracted from cluster C and Cluster B to identify genes that were differentially expressed between clusters. Genes with the 100 largest magnitude negative and positive values are displayed. For the difference between cluster B and A, many of the same genes that separate clusters C and A are present. This is not surprising, as the clusters all separate along the same axis ( $\vec{v}_{sep}$ ). Genes separating clusters B and A which are not present in this table as separating C and A are highlighted in orange or green.

**Supplementary Table 3. Go enrichment for genes in Tables 1 and 2.** Lists of genes characterizing the principal components,  $\vec{v}_{sep}$ , and  $\vec{v}_{het}$  were submitted for gene list analysis. Genes from the most significant enrichments and their corresponding go terms are listed here.

# Supplementary Figure 1

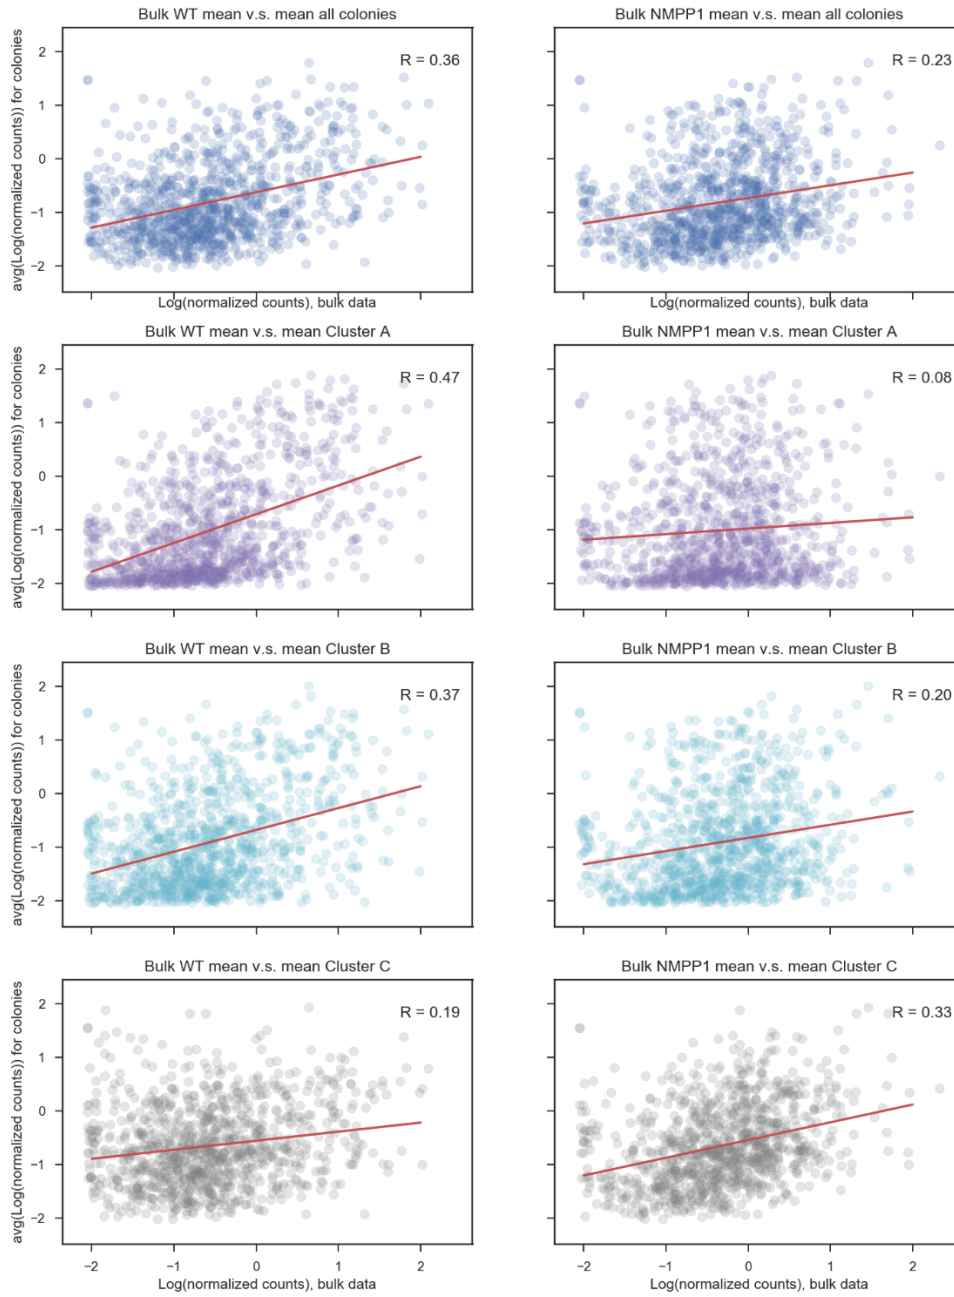

Supplementary Figure 2

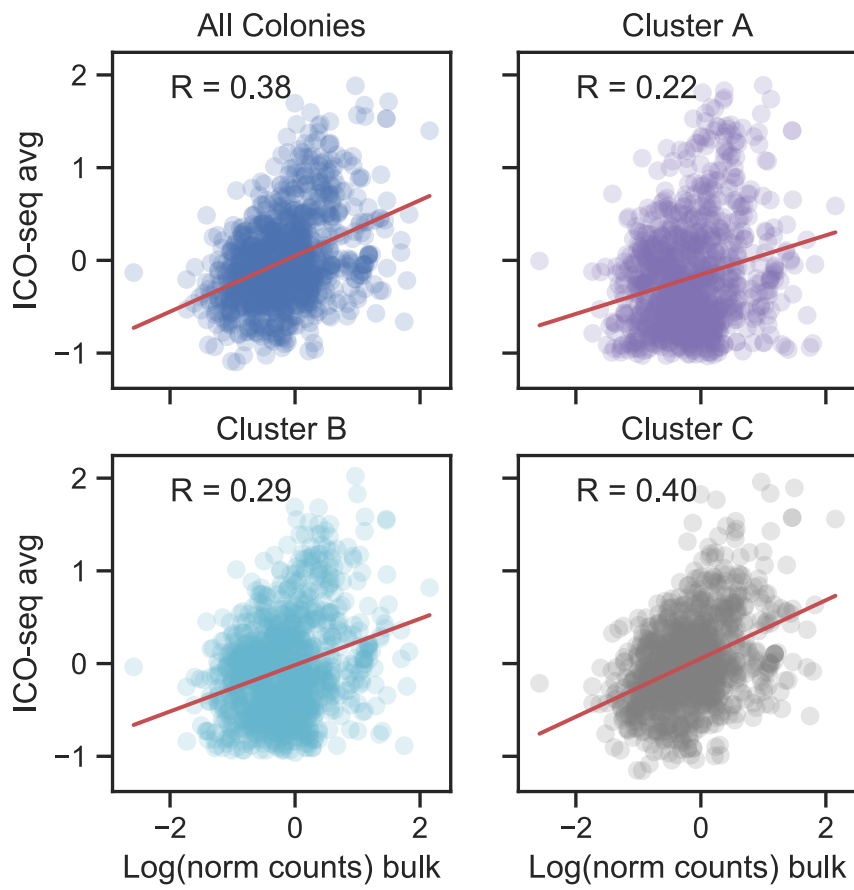

Supplementary Figure 3

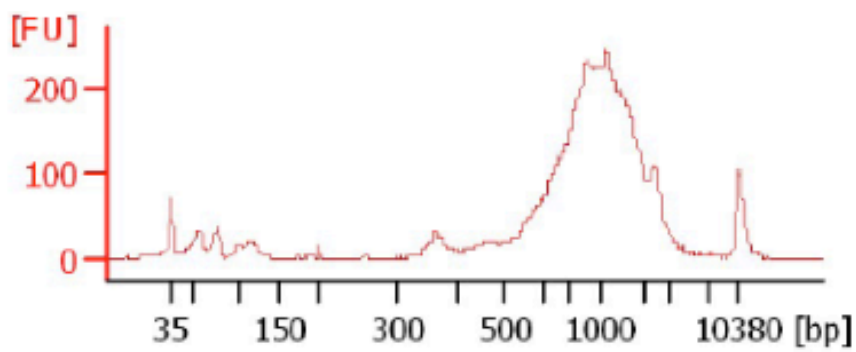

Supplementary Table 1

| Rank | PC1 negative genes | PC1 negative values | PC1 positive genes | PC1 positive values |
|------|--------------------|---------------------|--------------------|---------------------|
| 1    | RPL33B             | -0.043              | SPG4               | 0.083               |
| 2    | RPS25B             | -0.040              | SPG1               | 0.082               |
| 3    | RPL22B             | -0.036              | RGI2               | 0.080               |
| 4    | NIP7               | -0.034              | YDR034W-B          | 0.075               |
| 5    | RPL21B             | -0.031              | MRK1               | 0.075               |
| 6    | RPS19A             | -0.030              | YGR035C            | 0.074               |
| 7    | TIF11              | -0.029              | YOR019W            | 0.074               |
| 8    | APQ12              | -0.028              | YDR119W-A          | 0.070               |
| 9    | NRK1               | -0.027              | FMP43              | 0.069               |
| 10   | GPX2               | -0.027              | YKL065W-A          | 0.067               |
| 11   | CGR1               | -0.026              | HXT6               | 0.066               |
| 12   | RPB10              | -0.025              | OM14               | 0.066               |
| 13   | RPS27A             | -0.025              | FMP46              | 0.064               |
| 14   | YBL028C            | -0.024              | YLR312C            | 0.064               |
| 15   | URM1               | -0.023              | OLI1               | 0.063               |
| 16   | RPS18B             | -0.022              | YGR161W-C          | 0.063               |
| 17   | RPL34A             | -0.022              | YGR174W-A          | 0.063               |
| 18   | POP8               | -0.022              | CRS5               | 0.063               |
| 19   | YSY6               | -0.022              | UIP4               | 0.062               |
| 20   | RPS22B             | -0.021              | HXT7               | 0.062               |
| 21   | RPL14A             | -0.021              | GPX1               | 0.061               |
| 22   | GLN1               | -0.020              | YER121W            | 0.061               |
| 23   | DTD1               | -0.020              | DDR2               | 0.061               |
| 24   | RPS29A             | -0.020              | MSC1               | 0.061               |
| 25   | RPS17B             | -0.019              | YPR036W-A          | 0.061               |
| 26   | RPL36A             | -0.019              | TDH1               | 0.060               |
| 27   | RPL26A             | -0.019              | NQM1               | 0.060               |
| 28   | RPS30B             | -0.018              | SCEI               | 0.060               |
| 29   | NOP10              | -0.018              | FOX2               | 0.060               |
| 30   | RBL2               | -0.018              | YBR285W            | 0.060               |
| Rank | PC2 negative genes | PC2 negative values | PC2 positive genes | PC2 positive values |
| 1    | RPS25B             | -0.089              | SPG4               | 0.081               |
| 2    | RPL33B             | -0.086              | SPG1               | 0.077               |
| 3    | RPS19A             | -0.080              | RGI2               | 0.071               |
| 4    | GPX2               | -0.077              | MRK1               | 0.068               |
| 5    | RPL21B             | -0.077              | YDR034W-B          | 0.066               |
| 6    | RPL34A             | -0.076              | FMP43              | 0.058               |
| 7    | PHO88              | -0.076              | YKL065W-A          | 0.057               |
| 8    | RPS29A             | -0.076              | YOR019W            | 0.056               |
| 9    | TIF11              | -0.075              | YDR119W-A          | 0.055               |
| 10   | YSY6               | -0.075              | YER121W            | 0.051               |
| 11   | APQ12              | -0.075              | OLI1               | 0.050               |

|             |                           |                            |                           |                            |
|-------------|---------------------------|----------------------------|---------------------------|----------------------------|
| 12          | RPS22B                    | -0.074                     | TMA10                     | 0.048                      |
| 13          | PFD1                      | -0.074                     | YPR036W-A                 | 0.048                      |
| 14          | RPL36A                    | -0.073                     | CRS5                      | 0.047                      |
| 15          | RPL26A                    | -0.072                     | YGR035C                   | 0.046                      |
| 16          | RPB10                     | -0.071                     | YNR034W-A                 | 0.043                      |
| 17          | CAF20                     | -0.071                     | RGI1                      | 0.042                      |
| 18          | RBL2                      | -0.071                     | GPX1                      | 0.040                      |
| 19          | RPS29B                    | -0.071                     | HXT6                      | 0.040                      |
| 20          | OST4                      | -0.070                     | SCEI                      | 0.038                      |
| 21          | RPL20A                    | -0.069                     | CCW12                     | 0.037                      |
| 22          | RPL19A                    | -0.068                     | MSC1                      | 0.036                      |
| 23          | RPL14A                    | -0.068                     | YGR161W-C                 | 0.036                      |
| 24          | POP8                      | -0.068                     | HXT7                      | 0.036                      |
| 25          | RPL40B                    | -0.068                     | YOR052C                   | 0.035                      |
| 26          | NTF2                      | -0.068                     | UIP4                      | 0.034                      |
| 27          | NIP7                      | -0.068                     | YGR174W-A                 | 0.034                      |
| 28          | VMA21                     | -0.067                     | SIP18                     | 0.033                      |
| 29          | NOP10                     | -0.067                     | YLR257W                   | 0.033                      |
| 30          | YBL028C                   | -0.067                     | GLC8                      | 0.032                      |
| <b>Rank</b> | <b>PC3 negative genes</b> | <b>PC3 negative values</b> | <b>PC3 positive genes</b> | <b>PC3 positive values</b> |
| 1           | YBL028C                   | -0.133                     | YLR053C                   | 0.152                      |
| 2           | LRP1                      | -0.113                     | YNR034W-A                 | 0.120                      |
| 3           | NIP7                      | -0.107                     | SIP18                     | 0.107                      |
| 4           | NOP15                     | -0.093                     | RGI1                      | 0.101                      |
| 5           | YML108W                   | -0.088                     | HSP104                    | 0.101                      |
| 6           | GPX2                      | -0.087                     | SER3                      | 0.095                      |
| 7           | CGR1                      | -0.085                     | GLN1                      | 0.090                      |
| 8           | LOC1                      | -0.076                     | GPG1                      | 0.089                      |
| 9           | NOP56                     | -0.075                     | YMR090W                   | 0.086                      |
| 10          | POP8                      | -0.072                     | AFT2                      | 0.086                      |
| 11          | EFB1                      | -0.068                     | STF1                      | 0.085                      |
| 12          | CBF5                      | -0.066                     | CYC7                      | 0.083                      |
| 13          | ALD6                      | -0.065                     | GRX1                      | 0.082                      |
| 14          | EBP2                      | -0.065                     | YSA1                      | 0.078                      |
| 15          | RPL2A                     | -0.065                     | PHM8                      | 0.075                      |
| 16          | URA1                      | -0.064                     | YNK1                      | 0.074                      |
| 17          | MRK1                      | -0.064                     | TMA10                     | 0.072                      |
| 18          | RGI2                      | -0.064                     | PGM2                      | 0.071                      |
| 19          | RPL43A                    | -0.063                     | URA10                     | 0.071                      |
| 20          | 15S_rRNA                  | -0.063                     | ERG28                     | 0.071                      |
| 21          | SPG1                      | -0.061                     | RTC2                      | 0.070                      |
| 22          | NHP2                      | -0.061                     | MTD1                      | 0.070                      |
| 23          | RPL37A                    | -0.061                     | NRK1                      | 0.070                      |
| 24          | CMS1                      | -0.060                     | AYR1                      | 0.069                      |
| 25          | YOR019W                   | -0.059                     | ENO1                      | 0.066                      |
| 26          | URM1                      | -0.058                     | LYS12                     | 0.065                      |

| 27   | RPP2A               | -0.057               | GLO1                | 0.065                |
|------|---------------------|----------------------|---------------------|----------------------|
| 28   | RPL22A              | -0.057               | GCV1                | 0.064                |
| 29   | SPG4                | -0.056               | HSP12               | 0.063                |
| 30   | SNF11               | -0.056               | ATP16               | 0.062                |
| Rank | Vsep negative genes | Vsep negative values | Vsep positive genes | Vsep positive values |
| 1    | RPL33B              | -0.100               | SPG4                | 0.130                |
| 2    | RPS25B              | -0.093               | SPG1                | 0.119                |
| 3    | TIF11               | -0.079               | YDR034W-B           | 0.117                |
| 4    | RPS18B              | -0.076               | RGI2                | 0.108                |
| 5    | RPS19A              | -0.074               | TMA10               | 0.102                |
| 6    | RPL21B              | -0.072               | MRK1                | 0.099                |
| 7    | NOP10               | -0.071               | MPC3                | 0.097                |
| 8    | RPS29A              | -0.070               | YER121W             | 0.095                |
| 9    | GPX2                | -0.070               | DPC7                | 0.091                |
| 10   | RPL27B              | -0.068               | COX26               | 0.090                |
| 11   | RPS30B              | -0.068               | SOL1                | 0.088                |
| 12   | RPS16A              | -0.068               | YOR019W             | 0.088                |
| 13   | APQ12               | -0.067               | OLI1                | 0.084                |
| 14   | RPS22B              | -0.067               | CRS5                | 0.082                |
| 15   | RPL14A              | -0.066               | SPO24               | 0.081                |
| 16   | RPL36A              | -0.066               | RGI1                | 0.080                |
| 17   | RPS21A              | -0.066               | YGR035C             | 0.079                |
| 18   | YSY6                | -0.066               | GPX1                | 0.070                |
| 19   | RPL26A              | -0.065               | HXT6                | 0.069                |
| 20   | HTA2                | -0.065               | TMC1                | 0.066                |
| 21   | NIP7                | -0.064               | MSC1                | 0.065                |
| 22   | RPL23A              | -0.063               | YGR161W-C           | 0.065                |
| 23   | RPS17B              | -0.063               | SCEI                | 0.065                |
| 24   | RPL34A              | -0.063               | CCW12               | 0.065                |
| 25   | PFD1                | -0.063               | YGR174W-A           | 0.065                |
| 26   | PHO88               | -0.063               | HXT7                | 0.065                |
| 27   | RPS28A              | -0.063               | YLR257W             | 0.064                |
| 28   | RPB10               | -0.063               | GLC8                | 0.064                |
| 29   | RPS23A              | -0.062               | UIP4                | 0.063                |
| 30   | RBL2                | -0.060               | SIP18               | 0.063                |
| Rank | Vhet negative genes | Vhet negative values | Vhet positive genes | Vhet positive values |
| 1    | MRPL38              | -0.050               | 21S_rRNA            | 0.006                |
| 2    | UBC7                | -0.050               | RPL24A              | 0.002                |
| 3    | MRP17               | -0.049               | CUP1-1              | 0.001                |
| 4    | CUE1                | -0.049               | CUP1-2              | 0.001                |
| 5    | MNP1                | -0.049               | SWE1                | 0.000                |
| 6    | YBR230W-A           | -0.049               | AIM41               | 0.000                |
| 7    | MRPS8               | -0.047               | RPL41A              | -0.001               |
| 8    | TVP18               | -0.047               | RPL23B              | -0.001               |
| 9    | SRB6                | -0.047               | RPS31               | -0.001               |

|    |           |        |           |        |
|----|-----------|--------|-----------|--------|
| 10 | MRPL49    | -0.047 | YBR085C-A | -0.002 |
| 11 | DAD4      | -0.046 | MTC6      | -0.002 |
| 12 | MIN7      | -0.046 | RPL29     | -0.002 |
| 13 | YKL033W-A | -0.045 | HMRA1     | -0.002 |
| 14 | RPL2B     | -0.045 | RPL41B    | -0.002 |
| 15 | TDH2      | -0.045 | TRX2      | -0.003 |
| 16 | COS4      | -0.045 | STF2      | -0.003 |
| 17 | VPS60     | -0.045 | SIP5      | -0.003 |
| 18 | FIS1      | -0.045 | RPL38     | -0.003 |
| 19 | RPL40B    | -0.045 | YMC1      | -0.003 |
| 20 | SRP21     | -0.044 | HOR7      | -0.003 |
| 21 | MIM1      | -0.044 | PMP3      | -0.004 |
| 22 | RPL18A    | -0.044 | PRP28     | -0.004 |
| 23 | TVP15     | -0.044 | BIR1      | -0.004 |
| 24 | ATP20     | -0.044 | ZEO1      | -0.004 |
| 25 | HUB1      | -0.044 | URB1      | -0.005 |
| 26 | YBR126W-A | -0.044 | RPS30A    | -0.005 |
| 27 | ISD11     | -0.044 | RPS12     | -0.005 |
| 28 | COX6      | -0.044 | RPL27A    | -0.005 |
| 29 | SKP1      | -0.044 | SSS1      | -0.005 |
| 30 | SFT1      | -0.044 | HHT1      | -0.005 |

**Supplementary Table 2**

| Rank | Cluster C - Cluster A Positive |        | Cluster C - Cluster A Negative |        | Cluster B - Cluster A Positive |        | Cluster B - Cluster A Negative |        |
|------|--------------------------------|--------|--------------------------------|--------|--------------------------------|--------|--------------------------------|--------|
|      | Genes                          | Values | Genes                          | Values | Genes                          | Values | Genes                          | Values |
| 1    | SPG4                           | 3.39   | RPL33B                         | -2.22  | YNR034W-A                      | 2.05   | GPX2                           | -1.62  |
| 2    | YDR034W-B                      | 3.13   | RPS25B                         | -1.96  | SIP18                          | 1.79   | YBL028C                        | -1.57  |
| 3    | SPG1                           | 3.12   | TIF11                          | -1.61  | RGI1                           | 1.77   | NIP7                           | -1.50  |
| 4    | RGI2                           | 2.86   | RPS18B                         | -1.55  | GPG1                           | 1.38   | POP8                           | -1.06  |
| 5    | TMA10                          | 2.85   | GPX2                           | -1.53  | YMR090W                        | 1.31   | CGR1                           | -1.05  |
| 6    | MRK1                           | 2.64   | NIP7                           | -1.51  | ENO1                           | 1.29   | LRP1                           | -0.98  |
| 7    | MPC3                           | 2.63   | RPS19A                         | -1.49  | HSP104                         | 1.28   | LOC1                           | -0.95  |
| 8    | YNR034W-A                      | 2.58   | RPL21B                         | -1.48  | TMA10                          | 1.27   | URM1                           | -0.82  |
| 9    | YER121W                        | 2.57   | NOP10                          | -1.43  | GPX1                           | 1.25   | RPL37A                         | -0.81  |
| 10   | YDR119W-A                      | 2.54   | RPS30B                         | -1.40  | YLR053C                        | 1.21   | NOP56                          | -0.78  |
| 11   | YKL065W-A                      | 2.46   | APQ12                          | -1.37  | CRS5                           | 1.19   | RPL43A                         | -0.78  |
| 12   | YOR019W                        | 2.45   | RPS17B                         | -1.36  | CYC7                           | 1.15   | RPO26                          | -0.76  |
| 13   | CRS5                           | 2.42   | RPL27B                         | -1.36  | HSP12                          | 1.15   | YDL121C                        | -0.75  |
| 14   | RGI1                           | 2.37   | RPL22B                         | -1.34  | URA10                          | 1.13   | RPL36A                         | -0.75  |
| 15   | YGR035C                        | 2.36   | RPS23A                         | -1.32  | PGM2                           | 1.10   | NOP15                          | -0.73  |
| 16   | OLI1                           | 2.23   | RPS21A                         | -1.32  | TDH1                           | 1.07   | RPS27A                         | -0.73  |
| 17   | YPR036W-A                      | 2.22   | YBL028C                        | -1.31  | RTC2                           | 1.01   | RPL22A                         | -0.72  |



|    |           |      |           |       |           |      |         |       |
|----|-----------|------|-----------|-------|-----------|------|---------|-------|
| 18 | GPX1      | 2.13 | RPS29A    | -1.30 | STF1      | 0.99 | RPS29A  | -0.71 |
| 19 | HXT6      | 2.07 | RPS22B    | -1.30 | PHM8      | 0.95 | NHP2    | -0.70 |
| 20 | TDH1      | 2.02 | YSY6      | -1.29 | GLO1      | 0.94 | RPL26A  | -0.68 |
| 21 | GPG1      | 2.01 | RPS10A    | -1.29 | NCE102    | 0.93 | CSN9    | -0.68 |
| 22 | YGR161W-C | 1.99 | RPB10     | -1.27 | AFT2      | 0.93 | RPS22B  | -0.67 |
| 23 | YGR174W-A | 1.97 | POP8      | -1.25 | GPM1      | 0.93 | RPL31B  | -0.67 |
| 24 | HXT7      | 1.97 | RPL14A    | -1.25 | MSC1      | 0.92 | NOP10   | -0.66 |
| 25 | SIP18     | 1.97 | RPL36A    | -1.24 | HSP82     | 0.90 | RPB10   | -0.62 |
| 26 | MSC1      | 1.96 | RPL26A    | -1.24 | YHR138C   | 0.90 | RPC11   | -0.62 |
| 27 | UIP4      | 1.94 | HTA2      | -1.22 | GRX1      | 0.87 | CMS1    | -0.60 |
| 28 | FMP46     | 1.91 | RPL34A    | -1.20 | GPH1      | 0.86 | PFD1    | -0.60 |
| 29 | OM14      | 1.90 | RPS28A    | -1.19 | HSP78     | 0.85 | RPL40B  | -0.60 |
| 30 | CCW12     | 1.90 | RPS16A    | -1.19 | YNK1      | 0.83 | YML108W | -0.60 |
| 31 | YOR052C   | 1.89 | RPL23A    | -1.19 | GLC3      | 0.80 | YSY6    | -0.59 |
| 32 | DDR2      | 1.86 | RPS18A    | -1.17 | YOR052C   | 0.80 | FYV7    | -0.58 |
| 33 | FOX2      | 1.85 | PFD1      | -1.16 | LYS12     | 0.79 | RPS1B   | -0.58 |
| 34 | ATG8      | 1.84 | PHO88     | -1.13 | UIP4      | 0.78 | RPC10   | -0.57 |
| 35 | GPH1      | 1.84 | NRK1      | -1.13 | HSP30     | 0.78 | RPL22B  | -0.56 |
| 36 | YLR257W   | 1.83 | RPS7A     | -1.12 | YSA1      | 0.77 | YIP3    | -0.55 |
| 37 | GLC8      | 1.81 | RBL2      | -1.11 | ADH1      | 0.77 | RPL37B  | -0.55 |
| 38 | SCEI      | 1.79 | CGR1      | -1.11 | STF2      | 0.76 | RPL34A  | -0.55 |
| 39 | GRX2      | 1.79 | RPL16A    | -1.10 | YBR056W   | 0.76 | RPL12A  | -0.55 |
| 40 | HSP82     | 1.78 | RPS17A    | -1.10 | ERG28     | 0.76 | RPP2A   | -0.54 |
| 41 | YLR312C   | 1.78 | RPS6B     | -1.10 | COS1      | 0.75 | RPP1A   | -0.52 |
| 42 | URA10     | 1.76 | RPL35B    | -1.09 | HSC82     | 0.74 | RPL27B  | -0.52 |
| 43 | YHR138C   | 1.73 | URM1      | -1.09 | ATG8      | 0.74 | RPS15   | -0.51 |
| 44 | RFS1      | 1.72 | RPL21A    | -1.09 | TDH2      | 0.71 | RPS19A  | -0.51 |
| 45 | VPS21     | 1.68 | RPS27A    | -1.08 | EMP46     | 0.70 | GIM4    | -0.51 |
| 46 | NHP6B     | 1.68 | RPS22A    | -1.07 | YKL065W-A | 0.70 | RPL39   | -0.50 |
| 47 | TMA17     | 1.67 | CAF20     | -1.06 | AYR1      | 0.70 | RPL13B  | -0.49 |
| 48 | UBI4      | 1.66 | RPL26B    | -1.05 | PBI2      | 0.70 | RPL21B  | -0.49 |
| 49 | YOR289W   | 1.64 | RPL35A    | -1.05 | PST2      | 0.70 | PGA2    | -0.49 |
| 50 | SUE1      | 1.64 | OST4      | -1.04 | GLC8      | 0.69 | RPS29B  | -0.47 |
| 51 | 15S_rRNA  | 1.63 | TSC3      | -1.03 | ARC15     | 0.69 | RPL1A   | -0.46 |
| 52 | GLO1      | 1.62 | RPO26     | -1.02 | YET1      | 0.68 | URA1    | -0.46 |
| 53 | GLO2      | 1.62 | MFA2      | -1.01 | YPR098C   | 0.68 | RPL2A   | -0.46 |
| 54 | YGR182C   | 1.58 | RPS30A    | -1.01 | HSP26     | 0.68 | RPS22A  | -0.46 |
| 55 | MRP8      | 1.58 | YFR032C-B | -0.99 | YLR271W   | 0.67 | RPS24B  | -0.46 |
| 56 | YBR285W   | 1.58 | RPS21B    | -0.99 | DDR2      | 0.67 | EFB1    | -0.46 |
| 57 | HSP12     | 1.57 | RPS8B     | -0.98 | COS3      | 0.66 | RPL33B  | -0.46 |
| 58 | YMR090W   | 1.57 | GIM4      | -0.98 | YET2      | 0.66 | RPS16B  | -0.46 |
| 59 | NQM1      | 1.55 | NTF2      | -0.98 | DCS2      | 0.66 | RPL16A  | -0.45 |
| 60 | MPC1      | 1.54 | RPL43B    | -0.96 | YDR379C-A | 0.65 | RPL19A  | -0.45 |
| 61 | UBC8      | 1.54 | SUI1      | -0.96 | SNA2      | 0.64 | RPS17B  | -0.44 |
| 62 | YBR056W   | 1.54 | RPS6A     | -0.95 | SER3      | 0.64 | RPL20A  | -0.44 |
| 63 | SNF11     | 1.52 | GLN1      | -0.94 | RCF1      | 0.63 | HTA1    | -0.44 |

|     |           |      |           |       |           |      |           |       |
|-----|-----------|------|-----------|-------|-----------|------|-----------|-------|
| 64  | YKL091C   | 1.51 | RPS10B    | -0.94 | YLR227W-B | 0.63 | YKE2      | -0.44 |
| 65  | FMP16     | 1.51 | ARF1      | -0.93 | YGR027W-B | 0.63 | RPS21B    | -0.43 |
| 66  | MIA40     | 1.50 | RPS29B    | -0.92 | RNY1      | 0.63 | ZEO1      | -0.43 |
| 67  | PST2      | 1.50 | RPS24A    | -0.92 | YER121W   | 0.63 | RPL19B    | -0.42 |
| 68  | SDH3      | 1.49 | RPS19B    | -0.92 | YET3      | 0.62 | RPL12B    | -0.42 |
| 69  | PAI3      | 1.48 | RPS9B     | -0.89 | YDR119W-A | 0.62 | RPL23A    | -0.41 |
| 70  | GSY2      | 1.48 | RPS8A     | -0.89 | MBF1      | 0.62 | RPL33A    | -0.40 |
| 71  | GLC3      | 1.48 | RPC11     | -0.88 | YOR020W-A | 0.60 | YLR146W-A | -0.39 |
| 72  | YNL208W   | 1.48 | RPL25     | -0.88 | BMH1      | 0.60 | RPS25B    | -0.39 |
| 73  | MDG1      | 1.47 | DTD1      | -0.88 | RFS1      | 0.60 | RPL43B    | -0.39 |
| 74  | PGK1      | 1.47 | RPL31B    | -0.88 | COX5B     | 0.60 | RPS21A    | -0.38 |
| 75  | YLR346C   | 1.47 | RPC10     | -0.87 | FIS1      | 0.59 | CBF5      | -0.38 |
| 76  | RRT8      | 1.46 | RPL23B    | -0.86 | YOR289W   | 0.59 | YDL157C   | -0.37 |
| 77  | ARA1      | 1.45 | NAT5      | -0.85 | FMP16     | 0.59 | LSM6      | -0.37 |
| 78  | SNC2      | 1.41 | ARL1      | -0.85 | HXT7      | 0.58 | RPL1B     | -0.37 |
| 79  | RPN8      | 1.41 | RPS27B    | -0.85 | YKL066W   | 0.58 | RPS11A    | -0.36 |
| 80  | AI1       | 1.41 | YDL121C   | -0.83 | LIP1      | 0.58 | YEF3      | -0.36 |
| 81  | PDR5      | 1.40 | VMA21     | -0.83 | ARF2      | 0.57 | RPL38     | -0.35 |
| 82  | YBR201C-A | 1.40 | RPL43A    | -0.83 | YBR085C-A | 0.57 | YBR191W-A | -0.35 |
| 83  | YJR008W   | 1.39 | RPL20B    | -0.83 | RRT8      | 0.57 | RPP1B     | -0.34 |
| 84  | NYV1      | 1.38 | RPL11B    | -0.83 | COS2      | 0.57 | RPL27A    | -0.34 |
| 85  | YBL039W-B | 1.38 | YNL010W   | -0.82 | ATP16     | 0.57 | RPS19B    | -0.34 |
| 86  | CYC7      | 1.37 | RPL42A    | -0.81 | CNL1      | 0.56 | RPS10A    | -0.34 |
| 87  | AI4       | 1.36 | RPL20A    | -0.81 | YGR174W-A | 0.56 | RPL16B    | -0.34 |
| 88  | MAG1      | 1.35 | FYV7      | -0.80 | MRPL36    | 0.55 | DTD1      | -0.34 |
| 89  | YET2      | 1.35 | YEF3      | -0.80 | PNC1      | 0.55 | ALD6      | -0.33 |
| 90  | GPM1      | 1.34 | RPL39     | -0.80 | YDC1      | 0.54 | RPS9B     | -0.33 |
| 91  | YLR271W   | 1.34 | LEU1      | -0.80 | YKL068W-A | 0.54 | YOL086W-A | -0.33 |
| 92  | YOR1      | 1.34 | RPL29     | -0.80 | FMP33     | 0.54 | RPL23B    | -0.33 |
| 93  | YDC1      | 1.33 | YLR146W-A | -0.79 | UBC1      | 0.53 | SRB7      | -0.33 |
| 94  | PBI2      | 1.33 | RPS16B    | -0.78 | MET14     | 0.53 | RPL42A    | -0.31 |
| 95  | FMP33     | 1.32 | RPS26B    | -0.77 | TVP15     | 0.53 | RPS0B     | -0.31 |
| 96  | ENO1      | 1.32 | YKE2      | -0.77 | DAP1      | 0.52 | RPS10B    | -0.30 |
| 97  | YGR053C   | 1.31 | YRB1      | -0.77 | PAI3      | 0.52 | RPS27B    | -0.30 |
| 98  | GRX1      | 1.31 | RPS23B    | -0.77 | YLR257W   | 0.51 | UPS2      | -0.30 |
| 99  | HYP2      | 1.31 | VMA7      | -0.76 | ABF2      | 0.50 | APT1      | -0.30 |
| 100 | MCR1      | 1.30 | RPL19A    | -0.76 | TPI1      | 0.50 | CWP2      | -0.30 |

### Supplementary Table 3

|            |                                                                                                      |
|------------|------------------------------------------------------------------------------------------------------|
| Go Term:   | ncRNA processing                                                                                     |
| p-Value:   | 9.90E-04                                                                                             |
| Gene List: | 30 Genes with largest magnitude positive values in the PC3 vector                                    |
| Method:    | The gene list was submitted to the Saccharomyces Genome Database's Gene List analysis on 08/15/2018. |

| ORF Name | Gene Name | SGD Identifier | Go Term ID | Go Term Name                                                                                                                                        | Parent Go Term | Parent Go Term Name |
|----------|-----------|----------------|------------|-----------------------------------------------------------------------------------------------------------------------------------------------------|----------------|---------------------|
| YBL018C  | POP8      | S000000114     | GO:0006364 | rRNA processing                                                                                                                                     | GO:0034470     | ncRNA processing    |
| YBL018C  | POP8      | S000000114     | GO:0008033 | tRNA processing                                                                                                                                     | GO:0034470     | ncRNA processing    |
| YBL018C  | POP8      | S000000114     | GO:0034965 | intronic box C/D snoRNA processing                                                                                                                  | GO:0034470     | ncRNA processing    |
| YDL208W  | NHP2      | S000002367     | GO:0000469 | cleavage involved in rRNA processing                                                                                                                | GO:0034470     | ncRNA processing    |
| YDL208W  | NHP2      | S000002367     | GO:0000470 | maturaton of LSU-rRNA                                                                                                                               | GO:0034470     | ncRNA processing    |
| YDL208W  | NHP2      | S000002367     | GO:0006364 | rRNA processing                                                                                                                                     | GO:0034470     | ncRNA processing    |
| YDL208W  | NHP2      | S000002367     | GO:0031118 | rRNA pseudouridine synthesis                                                                                                                        | GO:0034470     | ncRNA processing    |
| YFR001W  | LOC1      | S000001897     | GO:0000447 | endonucleolytic cleavage in ITS1 to separate SSU-rRNA from 5.8S rRNA and LSU-rRNA from tricistronic rRNA transcript (SSU-rRNA, 5.8S rRNA, LSU-rRNA) | GO:0034470     | ncRNA processing    |
| YFR001W  | LOC1      | S000001897     | GO:0000472 | endonucleolytic cleavage to generate mature 5'-end of SSU-rRNA from (SSU-rRNA, 5.8S rRNA, LSU-rRNA)                                                 | GO:0034470     | ncRNA processing    |
| YFR001W  | LOC1      | S000001897     | GO:0000480 | endonucleolytic cleavage in 5'-ETS of tricistronic rRNA transcript (SSU-rRNA, 5.8S rRNA, LSU-rRNA)                                                  | GO:0034470     | ncRNA processing    |
| YGL029W  | CGR1      | S000002997     | GO:0006364 | rRNA processing                                                                                                                                     | GO:0034470     | ncRNA processing    |
| YHR081W  | LRP1      | S000001123     | GO:0000467 | exonucleolytic trimming to generate mature 3'-end of 5.8S rRNA from tricistronic rRNA transcript (SSU-rRNA, 5.8S rRNA, LSU-rRNA)                    | GO:0034470     | ncRNA processing    |
| YHR081W  | LRP1      | S000001123     | GO:0006364 | rRNA processing                                                                                                                                     | GO:0034470     | ncRNA processing    |
| YHR081W  | LRP1      | S000001123     | GO:0034475 | U4 snRNA 3'-end processing                                                                                                                          | GO:0034470     | ncRNA processing    |
| YHR081W  | LRP1      | S000001123     | GO:0034476 | U5 snRNA 3'-end processing                                                                                                                          | GO:0034470     | ncRNA processing    |
| YHR081W  | LRP1      | S000001123     | GO:0071051 | polyadenylation-dependent snoRNA 3'-end processing                                                                                                  | GO:0034470     | ncRNA processing    |
| YIL008W  | URM1      | S000001270     | GO:0002098 | tRNA wobble uridine modification                                                                                                                    | GO:0034470     | ncRNA processing    |
| YIL008W  | URM1      | S000001270     | GO:0002143 | tRNA wobble position uridine thiolation                                                                                                             | GO:0034470     | ncRNA processing    |
| YIL008W  | URM1      | S000001270     | GO:0008033 | tRNA processing                                                                                                                                     | GO:0034470     | ncRNA processing    |
| YIL008W  | URM1      | S000001270     | GO:0034227 | tRNA thio-modification                                                                                                                              | GO:0034470     | ncRNA processing    |
| YKL172W  | EBP2      | S000001655     | GO:0006364 | rRNA processing                                                                                                                                     | GO:0034470     | ncRNA processing    |
| YLR175W  | CBF5      | S000004165     | GO:0000495 | box H/ACA snoRNA 3'-end processing                                                                                                                  | GO:0034470     | ncRNA processing    |
| YLR175W  | CBF5      | S000004165     | GO:0006364 | rRNA processing                                                                                                                                     | GO:0034470     | ncRNA processing    |
| YLR175W  | CBF5      | S000004165     | GO:0031118 | rRNA pseudouridine synthesis                                                                                                                        | GO:0034470     | ncRNA processing    |
| YLR185W  | RPL37A    | S000004175     | GO:0000448 | cleavage in ITS2 between 5.8S rRNA and LSU-rRNA of tricistronic rRNA transcript (SSU-rRNA, 5.8S rRNA, LSU-rRNA)                                     | GO:0034470     | ncRNA processing    |
| YLR197W  | NOP56     | S000004187     | GO:0000154 | rRNA modification                                                                                                                                   | GO:0034470     | ncRNA processing    |
| YLR197W  | NOP56     | S000004187     | GO:0006364 | rRNA processing                                                                                                                                     | GO:0034470     | ncRNA processing    |
| YNL110C  | NOP15     | S000005054     | GO:0006364 | rRNA processing                                                                                                                                     | GO:0034470     | ncRNA processing    |
| YPL211W  | NIP7      | S000006132     | GO:0000463 | maturaton of LSU-rRNA from tricistronic rRNA transcript (SSU-rRNA, 5.8S rRNA, LSU-rRNA)                                                             | GO:0034470     | ncRNA processing    |

|            |                                                                                                      |
|------------|------------------------------------------------------------------------------------------------------|
| Go Term:   | rRNA metabolic process                                                                               |
| p-Value:   | 1.70E-03                                                                                             |
| Gene List: | 30 Genes with largest magnitude positive values in the PC3 vector                                    |
| Method:    | The gene list was submitted to the Saccharomyces Genome Database's Gene List analysis on 08/15/2018. |

| ORF Name | Gene Name | SGD Identifier | Go Term ID | Go Term Name                                                                                                                                        | Parent Go Term | Parent Go Term Name    |
|----------|-----------|----------------|------------|-----------------------------------------------------------------------------------------------------------------------------------------------------|----------------|------------------------|
| YBL018C  | POP8      | S000000114     | GO:0006364 | rRNA processing                                                                                                                                     | GO:0016072     | rRNA metabolic process |
| YDL208W  | NHP2      | S000002367     | GO:0000469 | cleavage involved in rRNA processing                                                                                                                | GO:0016072     | rRNA metabolic process |
| YDL208W  | NHP2      | S000002367     | GO:0000470 | maturation of LSU-rRNA                                                                                                                              | GO:0016072     | rRNA metabolic process |
| YDL208W  | NHP2      | S000002367     | GO:0006364 | rRNA processing                                                                                                                                     | GO:0016072     | rRNA metabolic process |
| YDL208W  | NHP2      | S000002367     | GO:0031118 | rRNA pseudouridine synthesis                                                                                                                        | GO:0016072     | rRNA metabolic process |
| YFR001W  | LOC1      | S000001897     | GO:0000447 | endonucleolytic cleavage in ITS1 to separate SSU-rRNA from 5.8S rRNA and LSU-rRNA from tricistronic rRNA transcript (SSU-rRNA, 5.8S rRNA, LSU-rRNA) | GO:0016072     | rRNA metabolic process |
| YFR001W  | LOC1      | S000001897     | GO:0000472 | endonucleolytic cleavage to generate mature 5'-end of SSU-rRNA from (SSU-rRNA, 5.8S rRNA, LSU-rRNA)                                                 | GO:0016072     | rRNA metabolic process |
| YFR001W  | LOC1      | S000001897     | GO:0000480 | endonucleolytic cleavage in 5'-ETS of tricistronic rRNA transcript (SSU-rRNA, 5.8S rRNA, LSU-rRNA)                                                  | GO:0016072     | rRNA metabolic process |
| YGL029W  | CGR1      | S000002997     | GO:0006364 | rRNA processing                                                                                                                                     | GO:0016072     | rRNA metabolic process |
| YHR081W  | LRP1      | S000001123     | GO:0000467 | exonucleolytic trimming to generate mature 3'-end of 5.8S rRNA from tricistronic rRNA transcript (SSU-rRNA, 5.8S rRNA, LSU-rRNA)                    | GO:0016072     | rRNA metabolic process |
| YHR081W  | LRP1      | S000001123     | GO:0006364 | rRNA processing                                                                                                                                     | GO:0016072     | rRNA metabolic process |
| YHR081W  | LRP1      | S000001123     | GO:0071035 | nuclear polyadenylation-dependent rRNA catabolic process                                                                                            | GO:0016072     | rRNA metabolic process |
| YKL172W  | EBP2      | S000001655     | GO:0006364 | rRNA processing                                                                                                                                     | GO:0016072     | rRNA metabolic process |
| YLR175W  | CBF5      | S000004165     | GO:0006364 | rRNA processing                                                                                                                                     | GO:0016072     | rRNA metabolic process |
| YLR175W  | CBF5      | S000004165     | GO:0031118 | rRNA pseudouridine synthesis                                                                                                                        | GO:0016072     | rRNA metabolic process |
| YLR185W  | RPL37A    | S000004175     | GO:0000448 | cleavage in ITS2 between 5.8S rRNA and LSU-rRNA of tricistronic rRNA transcript (SSU-rRNA, 5.8S rRNA, LSU-rRNA)                                     | GO:0016072     | rRNA metabolic process |
| YLR197W  | NOP56     | S000004187     | GO:0000154 | rRNA modification                                                                                                                                   | GO:0016072     | rRNA metabolic process |
| YLR197W  | NOP56     | S000004187     | GO:0006364 | rRNA processing                                                                                                                                     | GO:0016072     | rRNA metabolic process |
| YNL110C  | NOP15     | S000005054     | GO:0006364 | rRNA processing                                                                                                                                     | GO:0016072     | rRNA metabolic process |
| YPL211W  | NIP7      | S000006132     | GO:0000463 | maturation of LSU-rRNA from tricistronic rRNA transcript (SSU-rRNA, 5.8S rRNA, LSU-rRNA)                                                            | GO:0016072     | rRNA metabolic process |
